# Supplementary material for: Identification of small molecules that are synthetically lethal upon knockout of the RNA ligase Rlig1 in human cells
Source: RSC Chem Biol. 2024 Jul 17;5(9):833–40. doi: 10.1039/d4cb00125g (PMC11353076; doi:10.1039/d4cb00125g)
Supplement: CB-005-D4CB00125G-s001 [file CB-005-D4CB00125G-s001.xlsx]

## Sheet: default_1
uiid	concentration	Catalog Number	productname	synonyms	CAS Number	target	pathway	Biological Activity	solubility	wt Raw data	wt corrected data	wt corrected data.npi	ko Raw data	ko corrected data	ko corrected data.npi	1-D Distance	Further Test?	Why no further testing
MCE27684F10	10mM	HY-124136	WYC-209		2131803-90-0	Apoptosis; Autophagy; RAR/RXR	Apoptosis; Autophagy; Metabolic Enzyme/Protease	WYC-209, a synthetic retinoid, is a retinoic acid receptor (RAR) agonist. WYC-209 induces apoptosis primarily via the caspase 3 pathway (IC50=0.19?μM for inmalignant murine melanoma TRCs), and has long-term effects with little toxicity[1].	H2O : < 0.1 mg/mL (insoluble); DMSO : 83.33 mg/mL (226.16 mM; Need ultrasonic)	121240	155265	79.9409	10083	10224.8	4.59181	75.3491	Yes
MCE27699F05	10mM	HY-B1508	Vitamin K4	acetomenaphthone	573-20-6	Apoptosis; Endogenous Metabolite	Apoptosis; Metabolic Enzyme/Protease	Vitamin K4 is a chemically synthesized Vitamin K which plays an important role in the normal blood coagulation system.	DMSO : 100 mg/mL (387.19 mM; Need ultrasonic); H2O : 0.67 mg/mL (2.59 mM; Need ultrasonic)	146770	144689	82.4817	47967	48469.1	23.2659	59.2157	Yes
MCE27695G11	10mM	HY-15230	Geldanamycin		30562-34-6	Antibiotic; Bacterial; HSP; Influenza Virus	Anti-infection; Cell Cycle/DNA Damage; Metabolic Enzyme/Protease	Geldanamycin is a Hsp90 inhibitor with antimicrobial activity against many Gram-positive and some Gram-negative bacteria. Geldanamycin has anti-influenza virus H5N1 activities.	DMSO : 50 mg/mL (89.18 mM; Need ultrasonic)	112930	119701	69.2122	40422	40472.4	17.8769	51.3353	Yes
MCE27675E06	10mM	HY-13818	Stattic		19983-44-9	Apoptosis; STAT	Apoptosis; JAK/STAT Signaling; Stem Cell/Wnt	Stattic is a potent STAT3 inhibitor and inhibits STAT3 phosphorylation (at Y705 and S727)[1]. Stattic inhibits the binding of a high affinity phosphopeptide for the SH2 domain of STAT3[2]. Stattic ameliorates the renal dysfunction in Alport syndrome (AS) mice[3].	DMSO : 50 mg/mL (236.75 mM; Need ultrasonic)	124860	127679	54.1663	9688	10034	3.86011	50.3062	Yes
MCE27684D12	10mM	HY-100671	L002		321695-57-2	Histone Acetyltransferase; STAT	Epigenetics; JAK/STAT Signaling; Stem Cell/Wnt	L002 is a potent, cell permeable, reversible and specific acetyltransferase p300 (KAT3B) inhibitor with an?IC50?of 1.98 μM[1]. L002 binds the acetyl-CoA pocket and competitively inhibits the FATp300 catalytic domain, blocks histone acetylation and p53 acetylation, and inhibits STAT3 activation[2]. L002 has the potential for hypertension‐induced cardiac hypertrophy and fibrogenesis treatment[3].	DMSO : 62.5 mg/mL (194.49 mM; Need ultrasonic)	141110	155111	79.8618	80577	82016.3	36.8322	43.0296	Yes
MCE27693I14	10mM	HY-114483	AES-135		2361659-61-0	HDAC	Cell Cycle/DNA Damage; Epigenetics	AES-135, a hydroxamic acid-based pan-HDAC inhibitor, prolongs survival in an orthotopic mouse model of pancreatic cancer. AES-135 inhibits HDAC3, HDAC6, HDAC8, and HDAC11 with IC50s ranging from 190-1100 nM[1].	DMSO : 100 mg/mL (144.16 mM; Need ultrasonic)	154500	161147	89.2493	104550	108113	46.414	42.8353	Yes
MCE27692L16	10mM	HY-15858	AP-III-a4	ENOblock	1177827-73-4	Enolase	Metabolic Enzyme/Protease	ENOblock(AP-III-a4) is a novel small molecule which is the first, nonsubstrate analogue that directly binds to enolase and inhibits its activity (IC50=0.576 uM); inhibit cancer cell metastasis in vivo. IC50 value: 0.576 uM [1] Target: enolase Enolase is a component of the glycolysis pathway and a “moonlighting” protein, with important roles in diverse cellular processes that are not related to it…	DMSO : 62.5 mg/mL (105.09 mM; ultrasonic and warming and heat to 60°C)	83097	86036.2	47.6283	12923	13543	6.29382	41.3344	Yes
MCE27687M19	10mM	HY-16172	DMAPT	Dimethylamino Parthenolide	870677-05-7	NF-κB	NF-κB	DMAPT (Dimethylamino Parthenolide), an analogue of Parthenolide (PTL), is an oral active NF-κB inhibitor, with a LD50 of 1.7 μM for cell population in AML cells. Has potential anti-cancer and anti-metastatic effect[1].	H2O : < 0.1 mg/mL (insoluble); DMSO : 125 mg/mL (426.04 mM; Need ultrasonic)	192860	185281	86.9976	111660	113532	46.2639	40.7337	Yes
MCE27680C08	10mM	HY-13721	Phenoxodiol	Idronoxil; Dehydroequol; Haginin E	81267-65-4	Apoptosis; Caspase; Topoisomerase	Apoptosis; Cell Cycle/DNA Damage	Phenoxodiol, a synthetic analog of Genestein, activates the mitochondrial caspase system, inhibits XIAP (an apoptosis inhibitor), and sensitizes the cancer cells to Fas-mediated apoptosis. This agent also inhibits DNA topoisomerase II by stabilizing the cleavable complex. Phenoxodiol induces cell cycle arrest in the G1/S phase of the cell cycle and upregulates p21WAF1 via a p53 independent manner…	DMSO : ≥ 100 mg/mL (416.23 mM); H2O : 1 mg/mL (4.16 mM; Need ultrasonic)	246630	244088	116.849	218650	216361	83.9951	32.8537	No	wt Raw data > 110%
MCE27686D15	10mM	HY-110404	Capzimin		2084868-04-0	Proteasome	Metabolic Enzyme/Protease	Capzimin is a potent and moderately specific proteasome isopeptidase Rpn11 inhibitor.	DMSO : ≥ 55.67 mg/mL (88.53 mM)	226930	219070	107.728	187810	206991	75.4202	32.3076	No	wt Raw data > 110%
MCE27693E19	10mM	HY-50898	Lapatinib	GW572016; GW2016	231277-92-2	Autophagy; EGFR; Ferroptosis	Apoptosis; Autophagy; JAK/STAT Signaling; Protein Tyrosine Kinase/RTK	Lapatinib (GW572016) is a potent inhibitor of the ErbB-2 and EGFR tyrosine kinase domains with IC50 values against purified EGFR and ErbB-2 of 10.2 and 9.8 nM, respectively[1].	DMSO : 125 mg/mL (215.12 mM; Need ultrasonic)	142560	150297	83.2401	109020	118702	50.9598	32.2804	Yes
MCE27701E13	10mM	HY-15856B	Flupentixol dihydrochloride	Flupenthixol dihydrochloride	2413-38-9	Others	Others	Flupentixol dihydrochloride, a thioxanthene drug, is used in therapy of schizophrenia as well as in anxiolytic and depressive disorders.	H2O : 100 mg/mL (197.07 mM; Need ultrasonic); DMSO : 33.33 mg/mL (65.68 mM; Need ultrasonic)	86012	84736.2	39.3932	16751	16638	7.27072	32.1225	Yes
MCE27672K20	10mM	HY-13067	Tripterin	Celastrol	34157-83-0	Apoptosis; Autophagy; Endogenous Metabolite; Mitophagy; Proteasome	Apoptosis; Autophagy; Metabolic Enzyme/Protease	Tripterin (Celastrol) is a proteasome inhibitor which potently and preferentially inhibits the chymotrypsin-like activity of a purified 20S proteasome with IC50 of 2.5 μM.	H2O : < 0.1 mg/mL (ultrasonic;warming;heat to 60°C) (insoluble); DMSO : 33.33 mg/mL (73.97 mM; Need ultrasonic)	128690	131149	60.1559	68037	71334.5	28.3664	31.7895	Yes
MCE27682E04	10mM	HY-10627A	GW3965 (hydrochloride)		405911-17-3	LXR	Metabolic Enzyme/Protease	GW3965 hydrochloride is a potent and selective liver X receptor (LXR) agonist with EC50s of 190 nM and 30 nM for hLXRα and hLXRβ, respectively[1][2][3].	DMSO : 100 mg/mL (161.68 mM; Need ultrasonic); H2O : < 0.1 mg/mL (ultrasonic;warming;heat to 60°C) (insoluble)	228840	261495	114.836	228490	217758	84.5242	30.3122	No	wt Raw data > 110%
MCE27695K09	10mM	HY-10465	Daclatasvir (dihydrochloride)	BMS-790052 (dihydrochloride); EBP 883 (dihydrochloride)	1009119-65-6	HCV	Anti-infection	Daclatasvir dihydrochloride (BMS-790052 dihydrochloride) is a potent and orally active HCV NS5A protein inhibitor with EC50s range of 9-146 pM for multiple HCV replicon genotypes. Daclatasvir dihydrochloride is also an organic anion transporting polypeptide 1B (OATP1B) and OATP1B3 inhibitor with IC50s of 1.5 μM and 3.27 μM, respectively[1][2][3].	DMSO : ≥ 56 mg/mL (68.98 mM); H2O : 50 mg/mL (61.59 mM; Need ultrasonic)	124370	141323	81.7138	105280	117008	51.6829	30.0309	Yes
MCE27684M20	10mM	HY-112596	H3B-6545		2052130-80-8	Estrogen Receptor/ERR	Others	H3B-6545 is an oral, selective estrogen receptor covalent antagonist (SERCA) for the research of metastatic ER-positive, HER2-negative breast cancer[1][2].	DMSO : 250 mg/mL (440.47 mM; Need ultrasonic)	178550	170569	87.8203	131220	131003	58.8314	28.9889	Yes
MCE27670I12	10mM	HY-130606	Nampt-IN-5		2380013-17-0	Cytochrome P450; NAMPT	Metabolic Enzyme/Protease	Nampt-IN-5 is a potent nicotinamide phosphoribosyltransferase (NAMPT) inhibitor. Nampt-IN-5 also inhibits CYP3A4 activity and has cellular IC50s of 0.7 nM and 3.9 nM against A2780 and COR-L23, respectively[1].	DMSO : 50 mg/mL (116.96 mM; Need ultrasonic)	115680	142910	65.6798	81280	91157.6	37.0082	28.6716	Yes
MCE27681O17	10mM	HY-108543	NSC 95397		93718-83-3	Apoptosis; Phosphatase	Apoptosis; Metabolic Enzyme/Protease	NSC 95397 is a potent, selective Cdc25 dual specificity phosphatase inhibitor (Ki=32 nM (Cdc25A), 96 nM (Cdc25B), 40 nM (Cdc25C); IC50=22.3 nM (human Cdc25A), 56.9 nM (human Cdc25C), 125 nM (Cdc25B))[1]. NSC 95397 inhibits mitogen-activated protein kinase phosphatase-1 (MKP-1) and suppresses proliferation and induces apoptosis in colon cancer cells through MKP-1 and ERK1/2 pathway[2].	DMSO : ≥ 100 mg/mL (322.18 mM)	96048	93934.7	45.5083	39913	38871.9	16.8757	28.6326	Yes
MCE27679O03	10mM	HY-103157	PD146176	NSC168807	4079-26-9	Autophagy; Ferroptosis	Apoptosis; Autophagy	PD146176 (NSC168807), a 15-Lipoxygenase (15-LO) inhibitor, inhibits rabbit reticulocyte 15-LO (Ki=197 nM, IC50=0.54 μM). PD146176 reverses cognitive impairment, brain amyloidosis, and tau pathology by stimulating autophagy in aged triple transgenic mice[1][2][3].	DMSO : 25 mg/mL (105.34 mM; Need ultrasonic)	155680	143131	63.7677	93742	86406.4	36.4768	27.2909	Yes
MCE27684A15	10mM	HY-P0216	A 779		159432-28-7	Angiotensin Receptor	GPCR/G Protein	A 779 is a specific antagonist of G-protein coupled receptor (Mas receptor), which is an Ang1-7 receptor distinct from the classical AngII.	H2O : 50 mg/mL (57.28 mM; Need ultrasonic)	195760	226418	116.576	208460	199721	89.6916	26.8841	No	wt Raw data > 110%
MCE27698I06	10mM	HY-130818	N-(5-Hydroxypentyl)maleimide		180608-78-0	ADC Linkers	Antibody-drug Conjugate/ADC Related	N-(5-Hydroxypentyl)maleimide is a non-cleavable ADC linker used in the synthesis of antibody-drug conjugates (ADCs), such as Gemcitabine-O-Si(di-iso)-O-Mc (HY-130812) )[1].	10 mM in DMSO	141030	141918	76.3217	118920	115716	50.1824	26.1393	No	low solubility
MCE27683L07	10mM	HY-111024	2,2,5,7,8-Pentamethyl-6-Chromanol	PMC	950-99-2	Androgen Receptor	Others	2,2,5,7,8-Pentamethyl-6-Chromanol (PMC) is the anti-oxidant moiety of vitamin E (α-tocopherol). 2,2,5,7,8-Pentamethyl-6-Chromanol has potent androgen receptor (AR) signaling modulation and anti-cancer activity against prostate cancer cell lines[1].	DMSO : 250 mg/mL (1134.76 mM; Need ultrasonic)	225680	221836	102.652	194010	201085	76.518	26.1336	Yes
MCE27684O19	10mM	HY-100526	XMU-MP-1		2061980-01-4	Hippo (MST)	Stem Cell/Wnt	XMU-MP-1 is a reversible and selective MST1/2 inhibitor with IC50s of 71.1 and 38.1 nM, respectively[1].	DMSO : 8 mg/mL (19.21 mM; Need ultrasonic)	175560	227904	117.34	203510	203472	91.3758	25.9647	No	low solubility, wt Raw data > 110%
