# Supplementary material for: Identification of small molecules that are synthetically lethal upon knockout of the RNA ligase Rlig1 in human cells
Source: RSC Chem Biol. 2024 Jul 17;5(9):833–40. doi: 10.1039/d4cb00125g (PMC11353076; doi:10.1039/d4cb00125g)
Supplement: CB-005-D4CB00125G-s002 [file CB-005-D4CB00125G-s002.xlsx]

## Sheet: default_1
uiid
